# Supplementary material for: Association between oxidative stress exposure and colorectal cancer risk in 98,395 participants: results from a prospective study
Source: Frontiers journal article supplement (doi:10.3389/fnut.2023.1284066), 2023-12-15
Supplement: Data_Sheet_1.PDF [file Data_Sheet_1.PDF]

**Supplementary Table 1. Oxidative balance score (OBS) point assignment scheme**

| <b>OBS components</b>         |                                    | <b>Score assignment scheme</b>       |                                    |  |
|-------------------------------|------------------------------------|--------------------------------------|------------------------------------|--|
| Total vitamin C <sup>a</sup>  | 0 = low (1 <sup>st</sup> tertile)  | 1 = medium (2 <sup>nd</sup> tertile) | 2 = high (3 <sup>rd</sup> tertile) |  |
| α-Carotene                    | 0 = low (1 <sup>st</sup> tertile)  | 1 = medium (2 <sup>nd</sup> tertile) | 2 = high (3 <sup>rd</sup> tertile) |  |
| Total β-carotene <sup>a</sup> | 0 = low (1 <sup>st</sup> tertile)  | 1 = medium (2 <sup>nd</sup> tertile) | 2 = high (3 <sup>rd</sup> tertile) |  |
| β-Cryptoxanthin               | 0 = low (1 <sup>st</sup> tertile)  | 1 = medium (2 <sup>nd</sup> tertile) | 2 = high (3 <sup>rd</sup> tertile) |  |
| Total vitamin E <sup>a</sup>  | 0 = low (1 <sup>st</sup> tertile)  | 1 = medium (2 <sup>nd</sup> tertile) | 2 = high (3 <sup>rd</sup> tertile) |  |
| Lutein                        | 0 = low (1 <sup>st</sup> tertile)  | 1 = medium (2 <sup>nd</sup> tertile) | 2 = high (3 <sup>rd</sup> tertile) |  |
| Lycopene                      | 0 = low (1 <sup>st</sup> tertile)  | 1 = medium (2 <sup>nd</sup> tertile) | 2 = high (3 <sup>rd</sup> tertile) |  |
| Total selenium <sup>a</sup>   | 0 = low (1 <sup>st</sup> tertile)  | 1 = medium (2 <sup>nd</sup> tertile) | 2 = high (3 <sup>rd</sup> tertile) |  |
| PUFA                          | 0 = high (3 <sup>rd</sup> tertile) | 1 = medium (2 <sup>nd</sup> tertile) | 2 = low (1 <sup>st</sup> tertile)  |  |
| Total iron <sup>a</sup>       | 0 = high (3 <sup>rd</sup> tertile) | 1 = medium (2 <sup>nd</sup> tertile) | 2 = low (1 <sup>st</sup> tertile)  |  |
| Smoking history               | 0 = current smoker                 | 1 = former smoker                    | 2 = never smoker                   |  |
| Aspirin                       | 0 = never                          | 1 = missing                          | 2 = regular user                   |  |
| Other NSAIDs                  | 0 = never                          | 1 = missing                          | 2 = regular user                   |  |
| Alcohol                       |                                    |                                      |                                    |  |
| Male                          | 0 = >14 drinks/week                | 1 = 1-14 drinks/week                 | 2 = none                           |  |
| Female                        | 0 = >7 drinks/week                 | 1 = 1-7 drinks/week                  | 2 = none                           |  |

*Abbreviations: NSAID = nonsteroidal anti-inflammatory drug (not including aspirin); PUFA = polyunsaturated fatty acids*  
*a Total intake = dietary plus supplement intakes; inclusion of supplemental intake based on the availability of supplemental intake information*

**Supplementary Table 2. Distribution of variables with missing data before and after imputation**

| Variable                             | Before imputation | After imputation | No. (%) with missing data |
|--------------------------------------|-------------------|------------------|---------------------------|
| Educational level                    |                   |                  | 178(0.18%)                |
| College below                        | 62372 (63.50%)    | 62550 (63.57%)   |                           |
| College graduate                     | 17348 (17.66%)    | 17348 (17.63%)   |                           |
| Postgraduate                         | 18497 (18.83%)    | 18497 (18.80%)   |                           |
| Body mass index (kg/m <sup>2</sup> ) | 27.21±4.82        | 27.20±4.79       | 1283(1.30%)               |
| Smoking pack years                   | 17.66±26.49       | 17.49±26.40      | 1084(1.10%)               |
| Family history of colorectal cancer  |                   |                  | 745(0.76%)                |
| No                                   | 85245 (87.30%)    | 85990 (87.39%)   |                           |
| Yes/Possibly                         | 12405 (12.70%)    | 12405 (12.61%)   |                           |
| History of diabetes                  |                   |                  | 511(0.52%)                |
| No                                   | 91421 (93.40%)    | 91932 (93.43%)   |                           |
| Yes                                  | 6463 (6.60%)      | 6463 (6.57%)     |                           |
| Physical activity (min/week)         | 125.15±123.32     | 122.58±108.67    | 24896(25.30%)             |
| History of Colonoscopy Screening     |                   |                  | 3129(3.18%)               |
| No                                   | 51878 (54.46%)    | 55007(55.90%)    |                           |
| Yes                                  | 43388 (45.54%)    | 43388(44.10%)    |                           |

**Supplementary Table 3. Baseline characteristics of study population according to sex**

| Characteristics                            | All participants | Male            | Female          | P-value |
|--------------------------------------------|------------------|-----------------|-----------------|---------|
| <b>Number</b>                              | 98395            | 47169           | 51226           |         |
| <b>OBS</b>                                 | 14.09±3.95       | 13.78±3.94      | 14.37±3.93      | <0.001  |
| <b>Age</b>                                 | 65.52±5.73       | 65.78±5.74      | 65.27±5.71      | <0.001  |
| <b>Race</b>                                |                  |                 |                 | 0.336   |
| White                                      | 91159 (92.65%)   | 43740 (92.73%)  | 47419 (92.57%)  |         |
| Non-white                                  | 7236 (7.35%)     | 3429 (7.27%)    | 3807 (7.43%)    |         |
| <b>Education level</b>                     |                  |                 |                 | <0.001  |
| College below                              | 62550 (63.57%)   | 27152 (57.56%)  | 35398 (69.10%)  |         |
| College graduate                           | 17348 (17.63%)   | 9291 (19.70%)   | 8057 (15.73%)   |         |
| Postgraduate                               | 18497 (18.80%)   | 10726 (22.74%)  | 7771 (15.17%)   |         |
| <b>Body mass index (kg/m<sup>2</sup>)</b>  | 27.20±4.79       | 27.47±4.04      | 26.96±5.37      | <0.001  |
| <b>Food Energy from Diet (kcal/day)</b>    | 1728.52±657.95   | 1970.04±694.48  | 1506.13±533.16  | <0.001  |
| <b>Smoking Pack Years</b>                  | 17.49±26.40      | 23.26±29.94     | 12.18±21.31     | <0.001  |
| <b>Drink Alcohol</b>                       |                  |                 |                 | <0.001  |
| No                                         | 26659 (27.09%)   | 10966 (23.25%)  | 15693 (30.63%)  |         |
| Yes                                        | 71736 (72.91%)   | 36203 (76.75%)  | 35533 (69.37%)  |         |
| <b>History of diabetes</b>                 |                  |                 |                 | <0.001  |
| No                                         | 91932 (93.43%)   | 43458 (92.13%)  | 48474 (94.63%)  |         |
| Yes                                        | 6463 (6.57%)     | 3711 (7.87%)    | 2752 (5.37%)    |         |
| <b>Family history of colorectal cancer</b> |                  |                 |                 | 0.001   |
| No                                         | 85990 (87.39%)   | 41393 (87.75%)  | 44597 (87.06%)  |         |
| Yes/Possibly                               | 12405 (12.61%)   | 5776 (12.25%)   | 6629 (12.94%)   |         |
| <b>History of Colonoscopy Screening</b>    |                  |                 |                 | <0.001  |
| No                                         | 55007 (55.90%)   | 27466 (58.23%)  | 27541 (53.76%)  |         |
| Yes                                        | 43388 (44.10%)   | 19703 (41.77%)  | 23685 (46.24%)  |         |
| <b>Total vitamin C (mg/day)</b>            | 377.99±387.72    | 354.48±381.62   | 399.64±392.02   | <0.001  |
| <b>α-Carotene (mcg/day)</b>                | 845.57±913.09    | 779.94±852.23   | 906.01±961.79   | <0.001  |
| <b>Total β-carotene (mcg/day)</b>          | 4673.45±3850.87  | 4362.18±3744.99 | 4960.06±3924.12 | <0.001  |
| <b>β-Cryptoxanthin (g/day)</b>             | 172.16±138.43    | 168.98±136.28   | 175.09±140.33   | <0.001  |
| <b>Total vitamin E (mg/day)</b>            | 153.00±176.08    | 136.75±172.83   | 167.97±177.72   | <0.001  |
| <b>Lutein (mcg/day)</b>                    | 2633.30±2593.67  | 2606.12±2564.00 | 2658.32±2620.47 | 0.002   |
| <b>Lycopene (mcg/day)</b>                  | 6447.77±6825.38  | 7242.26±7530.37 | 5716.21±6012.60 | <0.001  |
| <b>Total selenium (mcg/day)</b>            | 89.38±39.64      | 102.87±42.36    | 76.96±32.32     | <0.001  |
| <b>PUFA (g/day)</b>                        | 14.05±7.15       | 15.61±7.61      | 12.62±6.38      | <0.001  |
| <b>Total iron (mg/day)</b>                 | 23.74±11.40      | 24.31±11.64     | 23.21±11.15     | <0.001  |
| <b>Smoking history</b>                     |                  |                 |                 | <0.001  |
| never smoker                               | 47196 (47.97%)   | 17850 (37.84%)  | 29346 (57.29%)  |         |
| current smoker                             | 8987 (9.13%)     | 4691 (9.95%)    | 4296 (8.39%)    |         |
| former smoker                              | 42212 (42.90%)   | 24628 (52.21%)  | 17584 (34.33%)  |         |
| <b>Aspirin</b>                             |                  |                 |                 | <0.001  |
| never                                      | 51787 (52.63%)   | 22398 (47.48%)  | 29389 (57.37%)  |         |
| regular user                               | 46190 (46.94%)   | 24462 (51.86%)  | 21728 (42.42%)  |         |
| missing                                    | 418 (0.42%)      | 309 (0.66%)     | 109 (0.21%)     |         |
| <b>Other NSAIDs</b>                        |                  |                 |                 | <0.001  |
| never                                      | 68070 (69.18%)   | 32442 (68.78%)  | 35628 (69.55%)  |         |
| regular user                               | 3922 (3.99%)     | 1374 (2.91%)    | 2548 (4.97%)    |         |
| missing                                    | 26403 (26.83%)   | 13353 (28.31%)  | 13050 (25.48%)  |         |
| <b>Alcohol(drinks/week)</b>                | 0.65±1.41        | 0.95±1.80       | 0.37±0.83       | <0.001  |

Values are means (standard deviation) for continuous variables and percentages for categorical variables. Group comparisons of continuous variables utilized Student's t-tests. Categorical variables employed chi-squared tests to assess differences across quartiles.

**Supplementary Table 4. Association of reconstructed OBS with the risk of colorectal cancer in women <sup>a</sup>**

| Quintiles of OBS score  | No. of Participants | No. of Cases | Person-years | Hazard ratio (95% confidence interval) |                      |                      |
|-------------------------|---------------------|--------------|--------------|----------------------------------------|----------------------|----------------------|
|                         |                     |              |              | Unadjusted                             | Model 1 <sup>b</sup> | Model 2 <sup>c</sup> |
| Quintile 1 ( $\leq 8$ ) | 11993               | 129          | 103989.00    | 1.00 (reference)                       | 1.00 (reference)     | 1.00 (reference)     |
| Quintile 2 (9-11)       | 12154               | 135          | 106857.34    | 1.02 (0.80, 1.30)                      | 1.01 (0.80, 1.29)    | 1.04 (0.82, 1.33)    |
| Quintile 3 (12-13)      | 8630                | 81           | 76253.56     | 0.86 (0.65, 1.13)                      | 0.85 (0.64, 1.12)    | 0.89 (0.67, 1.18)    |
| Quintile 4 (14-15)      | 8298                | 77           | 73924.28     | 0.84 (0.63, 1.12)                      | 0.83 (0.62, 1.10)    | 0.87 (0.65, 1.17)    |
| Quintile 5 ( $>15$ )    | 10151               | 92           | 91150.79     | 0.82 (0.62, 1.07)                      | 0.81 (0.62, 1.05)    | 0.87 (0.64, 1.18)    |
| <i>P</i> for trend      |                     |              |              | 0.051                                  | 0.038                | 0.195                |

*a: The reconstructed OBS refers to the original OBS scoring system with PUFAs, aspirin, and NSAIDs removed as components. Hazard ratio was calculated using Cox proportional hazard regression models, P values were calculated from significance testing for the underlying linear trend in Cox models.*

*b: Adjusted for age (years) and race (white, non-white).*

*c: Adjusted for model 1 plus educational level (college below, college graduate, postgraduate), body mass index ( $\text{kg}/\text{m}^2$ ), family history of colorectal cancer (no, yes/possibly), pack-years (continuous), drinker (no, yes), history of diabetes (no, yes), physical activity (min/week), history of colon screen (no, yes), history of colorectal polyps (no, yes), history of colon related co-morbidity (no, yes), history of diverticulitis or diverticulosis (no, yes) and food energy from diet (kcal/day).*
